# Supplementary material
Source: HighWire-hosted journal article supplement (https://srh.bmj.com/content/47/2/137)
Supplement: inline-supplementary-material-1 [file inline-supplementary-material-1.pdf]

**Supplementary Table 1: Checklist for STI Risk Assessment for IUD candidates**

| Checklist for STI Risk Assessment of IUD candidates |                                                                                                                                      |                         |
|-----------------------------------------------------|--------------------------------------------------------------------------------------------------------------------------------------|-------------------------|
| Name: _____                                         |                                                                                                                                      | Date: _____             |
| Please circle the appropriate answer below:         |                                                                                                                                      |                         |
| #                                                   | Question                                                                                                                             | Answer                  |
| 1                                                   | Is the client less than 25 years old?                                                                                                | 1.... Yes      0.... No |
| 2.                                                  | Is she currently living apart from her husband or partner?                                                                           | 1.... Yes      0.... No |
| 3.                                                  | During the last year, has she had bleeding between periods or spotting within 24 hours after sex?                                    | 1.... Yes      0.... No |
| 4.                                                  | Is her school education less than secondary level*?                                                                                  | 1.... Yes      0.... No |
| 5.                                                  | How many different sexual partners has she had during the last 3 months?<br><i>Check A if none, B if one and C if more than one.</i> |                         |
|                                                     | A. <input type="checkbox"/> None .....                                                                                               | 0                       |
|                                                     | B. <input type="checkbox"/> One      No condoms use .....                                                                            | 0                       |
|                                                     | Some condom use .....                                                                                                                | 1                       |
|                                                     | Always used condoms .....                                                                                                            | 0                       |
|                                                     | C. <input type="checkbox"/> More than one      No condoms use .....                                                                  | 1                       |
|                                                     | Some condom use .....                                                                                                                | 1                       |
|                                                     | Always used condoms .....                                                                                                            | 0                       |

**Add up the circled scores****Total Score = \_\_\_\_\_**

|                                                                                                                                                | <b>Low Cervical Infection<br/>Population (&lt;10%)</b> | <b>High Cervical Infection<br/>Population (=10%)</b> |
|------------------------------------------------------------------------------------------------------------------------------------------------|--------------------------------------------------------|------------------------------------------------------|
| <b>Recommended Action</b>                                                                                                                      |                                                        |                                                      |
| <b>Counsel/refer for an IUD insertion<br/>without any reservation</b>                                                                          | <b>If score is 0-2</b>                                 | <b>If score is 0</b>                                 |
| <b>Consider presumptive treatment for<br/>chlamydia/gonorrhoea (if available) to<br/>counsel/refer to use another contraceptive<br/>method</b> | <b>If score is 3+</b>                                  | <b>If score is 1+</b>                                |

\*The level may change from less than secondary to a higher educational level if almost all women (>90%) have at least some secondary

**Supplementary Table 2: Frequency distribution of reproductive tract infections by reported ART use and screening tool criterion among women living with HIV screened for participation in an IUD trial, Cape Town, South Africa**

|                                               | <b>Non-ART<br/>(n=146, 48%)</b>          | <b>ART-user<br/>(n=157, 52%)</b>     | <b>Total<br/>(n=303)</b> | <b>p-value</b> |
|-----------------------------------------------|------------------------------------------|--------------------------------------|--------------------------|----------------|
| <b>Prevalence of RTIs</b>                     |                                          |                                      |                          |                |
| Gonorrhoea                                    | 12 (8%)                                  | 8 (5%)                               | 20 (7%)                  | 0.252          |
| Chlamydia+                                    | 20 (14%)                                 | 13 (8%)                              | 33 (11%)                 | 0.114          |
| Trichomoniasis+                               | 19 (13%)                                 | 18 (11%)                             | 37 (12%)                 | 0.664          |
| Bacterial vaginosis                           | 32 (22%)                                 | 22 (14%)                             | 54 (18%)                 | 0.068          |
| <b>Any reproductive tract infection (RTI)</b> | 62 (43%)                                 | 54 (34%)                             | 116 (38%)                | 0.149          |
| <b>Co-infection (&gt;1 RTI)</b>               | 18 (12%)                                 | 5 (3%)                               | 23 (8%)                  | 0.003          |
| <b>Abnormal Vaginal discharge ‡</b>           | 24 (17%)                                 | 18 (12%)                             | 42 (14%)                 | 0.191          |
|                                               | <b>Non-reactive RTI<br/>(n=187, 62%)</b> | <b>Reactive RTI<br/>(n=116, 38%)</b> | <b>Total<br/>(n=303)</b> | <b>p-value</b> |
| <b>Risk screening tool criterion</b>          |                                          |                                      |                          |                |
| <25 years                                     | 20 (11%)                                 | 19 (16%)                             | 39 (13%)                 | 0.151          |
| Live apart from partner                       | 121 (65%)                                | 73 (63%)                             | 194 (64%)                | 0.754          |
| Spotting/bleeding after sex                   | 8 (4%)                                   | 6 (5%)                               | 14 (5%)                  | 0.719          |
| Did not complete secondary schooling          | 147 (79%)                                | 90 (78%)                             | 237 (79%)                | 0.528          |
| Sexually active in the last 3 months          | 186 (81%)                                | 68 (92%)                             | 254 (84%)                | 0.030          |
| Inconsistent condom use                       | 65 (42%)                                 | 42 (42%)                             | 107 (42%)                | 0.887          |
| Mean risk score (SD)                          | 1.91 (0.83)                              | 1.98 (0.98)                          | 1.94 (0.887)             | 0.546          |
| <b>Abnormal Vaginal discharge ‡</b>           | 12 (7%)                                  | 30 (26%)                             | 42 (14%)                 | <0.001         |

Not recorded for six women

+ Five women were not tested for gonorrhoea and chlamydia

**Supplementary Table 3: Univariate logistic regression of risk score and detectable reproductive tract infection**

| Score | Total<br>(n=303) | Non-reactive<br>RTI<br>(n=187, 62%) | Non-reactive RTI<br>(n=187, 62%) | OR (95% CI)        |
|-------|------------------|-------------------------------------|----------------------------------|--------------------|
| 0     | 12 (4%)          | 10 (4%)                             | 2 (3%)                           | ref                |
| 1     | 81 (27%)         | 63 (28%)                            | 18 (24%)                         | 0.65 (0.19 - 2.20) |
| 2     | 132 (44%)        | 106 (46%)                           | 26 (35%)                         | 0.45 (0.13 - 1.48) |
| 3     | 69 (23%)         | 44 (19%)                            | 25 (34%)                         | 0.92 (0.27 - 3.12) |
| 4+    | 9 (3%)           | 6 (3%)                              | 3 (4%)                           | 0.80 (0.14 - 4.53) |
